# Supplementary material for: The complex story of a simple Brønsted acid: Unusual speciation of HBr in an ionic liquid medium
Source: Royal Society of Chemistry journal article supplement (doi:10.1039/c1dt10427f), 2011-01-01
Supplement: c1dt10427f.pdf [file c1dt10427f.pdf]

# The Complex Story of a Simple Brønsted Acid: Unusual Speciation of HBr in an Ionic Liquid Medium

Gordon W. Driver\* and Ilpo Mutikainen\*

## Supplementary Experimental Details:

**Materials:** Details for the purification of starting materials and methods used in preparation of the liquid formed from a 2:1 mole ratio of HBr and 1-methylimidazole, as used in this work (including and <sup>1</sup>H-NMR characterisation), are available in the literature.<sup>1</sup> Crystals of [(Hmim)<sub>3</sub>Br]<sup>2+</sup>Br<sup>-</sup>[H<sub>2</sub>Br<sub>3</sub>]<sup>-</sup> co-exist in equilibrium with the pure liquid of their own accord, at temperatures < 20 °C.

**X-Ray Diffraction:** A suitable crystal was selected from the mother liquid and mounted to a glass fibre using the oil-drop method.<sup>2</sup> Diffraction data were collected on a Nonius KappaCCD diffractometer (graphite-monochromated MoK  $\alpha$  radiation). The structure was solved by direct methods. The programs COLLECT,<sup>3</sup> SHELXS-97 and SHELXL-97,<sup>4</sup> were used for data reduction, structure solution and structure refinement, respectively: C<sub>12</sub>H<sub>23</sub>Br<sub>5</sub>N<sub>6</sub>,  $M_r = 650.91 \text{ g mol}^{-1}$ , crystal size 0.20 x 0.20 x 0.20 mm<sup>3</sup>, hexagonal, *P*-62*c*,  $a = 13.2000(10) \text{ \AA}$ ,  $b = 13.2000(10) \text{ \AA}$ ,  $c = 7.1170(10) \text{ \AA}$ ,  $V = 1073.93(19) \text{ \AA}^3$ ,  $Z = 2$ ,  $\rho_{\text{calc}} = 2013 \text{ kg m}^{-3}$ ,  $\mu = 9.362 \text{ mm}^{-1}$ , Mo K $\alpha$  radiation,  $\lambda = 0.71073 \text{ \AA}$ ,  $T = 173(2) \text{ K}$ ,  $2\theta_{\text{max}} = 25.05^\circ$ , reflections collected/unique = 13151/685,  $R_{\text{int}} = 0.0851$ ,  $R1 = 0.0364$ ,  $wR2 = 0.0789$ , ( $I > 2\sigma(I)$ ), largest diff. peak and hole 0.659 and -0.791 e  $\text{\AA}^{-3}$ . Refinement of  $F^2$  was performed against all reflections.

Complete X-ray crystallographic data can be obtained from the Cambridge Crystallographic Data Centre, quoting the number CCDC-812944. All non-hydrogen atoms were refined anisotropically. H atoms of the 3-methyl-1H-imidazolium cation were geometrically fixed and allowed to ride on the attached atoms and the hydrogen H(7) was found in the difference map and refined with riding temperature factor.

## Supplementary Tables

Table 1. Atomic coordinates ( $\times 10^4$ ) and equivalent isotropic displacement parameters ( $\text{\AA}^2 \times 10^3$ ) for [(Hmim)<sub>3</sub>Br]<sup>2+</sup>Br<sup>-</sup>[H<sub>2</sub>Br<sub>3</sub>]<sup>-</sup>. U(eq) is defined as 1/3 the trace of the orthogonalized U<sup>ij</sup> tensor.

|       | x        | y        | z    | U(eq) |
|-------|----------|----------|------|-------|
| N(1)  | 3252(9)  | 3896(8)  | 7500 | 28(2) |
| C(2)  | 4167(10) | 3797(13) | 7500 | 43(3) |
| N(3)  | 3907(11) | 2735(13) | 7500 | 44(3) |
| C(4)  | 2762(19) | 2111(14) | 7500 | 95(6) |
| C(5)  | 2334(12) | 2849(14) | 7500 | 65(5) |
| C(6)  | 3190(11) | 4990(10) | 7500 | 45(3) |
| Br(1) | 6667     | 3333     | 7500 | 36(1) |
| Br(2) | 6496(1)  | 6496(1)  | 0    | 37(1) |
| Br(3) | 10000    | 0        | 5000 | 31(1) |

Table 2. Bond lengths [Å] and angles [°] for [(Hmim)<sub>3</sub>Br]<sup>2+</sup>·Br<sup>-</sup>·[H<sub>2</sub>Br<sub>3</sub>]<sup>-</sup>.

|                  |           |
|------------------|-----------|
| N(1)-C(2)        | 1.278(16) |
| N(1)-C(5)        | 1.305(18) |
| N(1)-C(6)        | 1.486(13) |
| C(2)-N(3)        | 1.266(19) |
| C(2)-H(2)        | 0.9500    |
| N(3)-C(4)        | 1.31(2)   |
| N(3)-H(3)        | 0.8800    |
| C(4)-C(5)        | 1.35(2)   |
| C(4)-H(4)        | 0.9500    |
| C(5)-H(5)        | 0.9500    |
| C(6)-H(6A)       | 0.9800    |
| C(6)-H(6B)       | 0.9800    |
| C(6)-H(6C)       | 0.9800    |
| Br(2)-H(7)       | 1.87(7)   |
| C(2)-N(1)-C(5)   | 108.4(11) |
| C(2)-N(1)-C(6)   | 127.8(11) |
| C(5)-N(1)-C(6)   | 123.8(10) |
| N(3)-C(2)-N(1)   | 111.5(12) |
| N(3)-C(2)-H(2)   | 124.3     |
| N(1)-C(2)-H(2)   | 124.3     |
| C(2)-N(3)-C(4)   | 106.6(11) |
| C(2)-N(3)-H(3)   | 126.7     |
| C(4)-N(3)-H(3)   | 126.7     |
| N(3)-C(4)-C(5)   | 108.3(14) |
| N(3)-C(4)-H(4)   | 125.9     |
| C(5)-C(4)-H(4)   | 125.9     |
| N(1)-C(5)-C(4)   | 105.3(13) |
| N(1)-C(5)-H(5)   | 127.4     |
| C(4)-C(5)-H(5)   | 127.4     |
| N(1)-C(6)-H(6A)  | 109.5     |
| N(1)-C(6)-H(6B)  | 109.5     |
| H(6A)-C(6)-H(6B) | 109.5     |
| N(1)-C(6)-H(6C)  | 109.5     |
| H(6A)-C(6)-H(6C) | 109.5     |
| H(6B)-C(6)-H(6C) | 109.5     |

Symmetry transformations used to generate equivalent atoms.

Table 3. Anisotropic displacement parameters ( $\text{\AA}^2 \times 10^3$ ) for  $[(\text{Hmim})_3\text{Br}]^{2+}\text{Br}^-[\text{H}_2\text{Br}_3]^-$ . The anisotropic displacement factor exponent takes the form:  $-2\pi^2[h^2a^*U^{11} + \dots + 2hk a^* b^* U^{12}]$

|       | $U^{11}$ | $U^{22}$ | $U^{33}$ | $U^{23}$ | $U^{13}$ | $U^{12}$ |
|-------|----------|----------|----------|----------|----------|----------|
| N(1)  | 24(5)    | 20(5)    | 43(6)    | 0        | 0        | 14(5)    |
| C(2)  | 28(6)    | 40(8)    | 73(9)    | 0        | 0        | 27(7)    |
| N(3)  | 37(7)    | 50(7)    | 60(7)    | 0        | 0        | 33(6)    |
| C(4)  | 75(12)   | 35(7)    | 185(17)  | 0        | 0        | 35(9)    |
| C(5)  | 32(7)    | 34(7)    | 131(13)  | 0        | 0        | 19(6)    |
| C(6)  | 41(6)    | 24(6)    | 80(9)    | 0        | 0        | 23(6)    |
| Br(1) | 19(1)    | 19(1)    | 72(1)    | 0        | 0        | 9(1)     |
| Br(2) | 31(1)    | 31(1)    | 47(1)    | 0(1)     | 0(1)     | 14(1)    |
| Br(3) | 32(1)    | 32(1)    | 28(1)    | 0        | 0        | 16(1)    |

Table 4. Hydrogen coordinates ( $\times 10^4$ ) and isotropic displacement parameters ( $\text{\AA}^2 \times 10^3$ ) for  $[(\text{Hmim})_3\text{Br}]^{2+}\text{Br}^-[\text{H}_2\text{Br}_3]^-$ .

|       | x         | y         | z    | U(eq) |
|-------|-----------|-----------|------|-------|
| H(2)  | 4944      | 4440      | 7500 | 51    |
| H(3)  | 4399      | 2468      | 7500 | 53    |
| H(4)  | 2311      | 1281      | 7500 | 114   |
| H(5)  | 1536      | 2649      | 7500 | 78    |
| H(6A) | 3283      | 5288      | 8787 | 68    |
| H(6B) | 2431      | 4827      | 7004 | 68    |
| H(6C) | 3817      | 5577      | 6709 | 68    |
| H(7)  | 6460(190) | 6000(200) | 2500 | 55    |

## References:

1. G. Driver and K. E. Johnson, *Green Chem.*, 2003, **5**, 163-169.
2. T. Kottke and D. Stalke, *J. Appl. Crystallogr.*, 1993, **26**, 615-619.
3. *Nonius COLLECT, Nonius BV, Delft, The Netherlands*, 2002.
4. G. M. Sheldrick, *Acta Cryst. A*, 2008, **64**, 112-122.
